# Supplementary material
Source: PubMed Central journal article supplement (PMC5198110)
Supplement: Supp_Table3.pdf [file Supp_Table3.pdf]

SUPPLEMENTARY TABLE S3. RATIO OF MEAN IMPACTS PER GAME AT MULTIPLE PRLA AND PRRA THRESHOLDS

| <i>Threshold (g)</i>                             | <i>Ratio of mean impacts per game</i> | <i>Lower 95% CL</i> | <i>Upper 95% CL</i>   | <i>Uncorrected p value</i> | <i>Bonferroni Lower 95% CL</i> | <i>Bonferroni Upper 95% CL</i> | <i>Bonferroni p value</i> |
|--------------------------------------------------|---------------------------------------|---------------------|-----------------------|----------------------------|--------------------------------|--------------------------------|---------------------------|
| <i>High school football vs. college football</i> |                                       |                     |                       |                            |                                |                                |                           |
| 10                                               | 0.59                                  | 0.34                | 1.03                  | 0.062                      | 0.28                           | 1.24                           | 0.369                     |
| 20                                               | 0.61                                  | 0.35                | 1.08                  | 0.089                      | 0.29                           | 1.31                           | 0.534                     |
| 30                                               | 0.57                                  | 0.32                | 1.02                  | 0.059                      | 0.26                           | 1.25                           | 0.356                     |
| 40                                               | 0.54                                  | 0.3                 | 0.97                  | 0.039                      | 0.24                           | 1.19                           | 0.233                     |
| 50                                               | 0.48                                  | 0.26                | 0.87                  | 0.016                      | 0.21                           | 1.07                           | 0.095                     |
| 60                                               | 0.47                                  | 0.26                | 0.87                  | 0.016                      | 0.21                           | 1.07                           | 0.094                     |
| 70                                               | 0.43                                  | 0.22                | 0.84                  | 0.014                      | 0.18                           | 1.06                           | 0.083                     |
| 80                                               | 0.47                                  | 0.23                | 0.95                  | 0.034                      | 0.18                           | 1.21                           | 0.206                     |
| Global test: HF vs. CF                           |                                       | DF=8                | Wald statistic=18.6   |                            | p=0.017                        |                                |                           |
| <i>Threshold (rad/sec<sup>2</sup>)</i>           | <i>Ratio of mean impacts per game</i> | <i>Lower 95% CL</i> | <i>Upper 95% CL</i>   | <i>Uncorrected p value</i> | <i>Bonferroni Lower 95% CL</i> | <i>Bonferroni Upper 95% CL</i> | <i>Bonferroni p value</i> |
| 0                                                | 0.59                                  | 0.34                | 1.03                  | 0.062                      | 0.28                           | 1.24                           | 0.369                     |
| 2000                                             | 0.59                                  | 0.34                | 1.04                  | 0.067                      | 0.28                           | 1.26                           | 0.401                     |
| 4000                                             | 0.61                                  | 0.34                | 1.08                  | 0.087                      | 0.28                           | 1.31                           | 0.524                     |
| 6000                                             | 0.59                                  | 0.33                | 1.06                  | 0.075                      | 0.27                           | 1.29                           | 0.451                     |
| 8000                                             | 0.57                                  | 0.31                | 1.05                  | 0.069                      | 0.25                           | 1.29                           | 0.413                     |
| 10000                                            | 0.51                                  | 0.27                | 0.97                  | 0.041                      | 0.22                           | 1.22                           | 0.248                     |
| 12000                                            | 0.53                                  | 0.25                | 1.10                  | 0.087                      | 0.20                           | 1.41                           | 0.523                     |
| 14000                                            | 0.47                                  | 0.20                | 1.10                  | 0.082                      | 0.15                           | 1.47                           | 0.493                     |
| Global test: HF vs. CF                           |                                       | DF=8                | Wald statistic=27.6   |                            | p<0.001                        |                                |                           |
| <i>Threshold (g)</i>                             | <i>Ratio of mean impacts per game</i> | <i>Lower 95% CL</i> | <i>Upper 95% CL</i>   | <i>Uncorrected p value</i> | <i>Bonferroni Lower 95% CL</i> | <i>Bonferroni Upper 95% CL</i> | <i>Bonferroni p value</i> |
| <i>College lacrosse vs. college football</i>     |                                       |                     |                       |                            |                                |                                |                           |
| 10                                               | 0.47                                  | 0.30                | 0.76                  | 0.002                      | 0.25                           | 0.89                           | 0.010                     |
| 20                                               | 0.32                                  | 0.19                | 0.53                  | <0.001                     | 0.16                           | 0.63                           | <0.001                    |
| 30                                               | 0.20                                  | 0.10                | 0.41                  | <0.001                     | 0.08                           | 0.52                           | <0.001                    |
| 40                                               | 0.13                                  | 0.07                | 0.25                  | <0.001                     | 0.06                           | 0.31                           | <0.001                    |
| 50                                               | 0.09                                  | 0.05                | 0.18                  | <0.001                     | 0.04                           | 0.23                           | <0.001                    |
| 60                                               | 0.08                                  | 0.03                | 0.24                  | <0.001                     | 0.02                           | 0.34                           | <0.001                    |
| 70                                               | 0.09                                  | 0.03                | 0.25                  | <0.001                     | 0.02                           | 0.35                           | <0.001                    |
| 80                                               | 0.10                                  | 0.02                | 0.43                  | 0.002                      | 0.01                           | 0.71                           | 0.012                     |
| Global test: CL vs. CF                           |                                       | DF=8                | Wald statistic=2025.4 |                            | p<0.001                        |                                |                           |
| <i>Threshold (rad/sec<sup>2</sup>)</i>           | <i>Ratio of mean impacts per game</i> | <i>Lower 95% CL</i> | <i>Upper 95% CL</i>   | <i>Uncorrected p value</i> | <i>Bonferroni Lower 95% CL</i> | <i>Bonferroni Upper 95% CL</i> | <i>Bonferroni p value</i> |
| 0                                                | 0.47                                  | 0.30                | 0.76                  | 0.002                      | 0.25                           | 0.89                           | 0.010                     |
| 2000                                             | 0.36                                  | 0.24                | 0.54                  | <0.001                     | 0.21                           | 0.62                           | <0.001                    |
| 4000                                             | 0.25                                  | 0.14                | 0.45                  | <0.001                     | 0.12                           | 0.55                           | <0.001                    |
| 6000                                             | 0.20                                  | 0.10                | 0.39                  | <0.001                     | 0.08                           | 0.50                           | <0.001                    |
| 8000                                             | 0.17                                  | 0.07                | 0.39                  | <0.001                     | 0.06                           | 0.51                           | <0.001                    |
| 10000                                            | 0.16                                  | 0.06                | 0.39                  | <0.001                     | 0.05                           | 0.54                           | <0.001                    |
| 12000                                            | 0.11                                  | 0.05                | 0.26                  | <0.001                     | 0.03                           | 0.34                           | <0.001                    |
| 14000                                            | 0.03                                  | 0.00                | 0.15                  | <0.001                     | 0.00                           | 0.28                           | <0.001                    |
| Global test: CL vs. CF                           |                                       | DF=8                | Wald statistic=264.1  |                            | p<0.001                        |                                |                           |
| <i>Threshold (g)</i>                             | <i>Ratio of mean impacts per game</i> | <i>Lower 95% CL</i> | <i>Upper 95% CL</i>   | <i>Uncorrected p value</i> | <i>Bonferroni Lower 95% CL</i> | <i>Bonferroni Upper 95% CL</i> | <i>Bonferroni p value</i> |
| <i>College soccer vs. college football</i>       |                                       |                     |                       |                            |                                |                                |                           |
| 10                                               | 1.28                                  | 0.59                | 2.80                  | 0.531                      | 0.45                           | 3.67                           | 1.000                     |
| 20                                               | 0.49                                  | 0.30                | 0.78                  | 0.003                      | 0.26                           | 0.92                           | 0.017                     |

(continued)

SUPPLEMENTARY TABLE S3. (CONTINUED)

| <i>Threshold (g)</i>                             | <i>Ratio of mean impacts per game</i> | <i>Lower 95% CL</i> | <i>Upper 95% CL</i>   | <i>Uncorrected p value</i> | <i>Bonferroni Lower 95% CL</i> | <i>Bonferroni Upper 95% CL</i> | <i>Bonferroni p value</i> |
|--------------------------------------------------|---------------------------------------|---------------------|-----------------------|----------------------------|--------------------------------|--------------------------------|---------------------------|
| 30                                               | 0.37                                  | 0.19                | 0.70                  | 0.003                      | 0.15                           | 0.88                           | 0.015                     |
| 40                                               | 0.30                                  | 0.13                | 0.68                  | 0.004                      | 0.10                           | 0.90                           | 0.023                     |
| 50                                               | 0.19                                  | 0.09                | 0.42                  | <0.001                     | 0.06                           | 0.55                           | <0.001                    |
| 60                                               | 0.16                                  | 0.08                | 0.30                  | <0.001                     | 0.07                           | 0.37                           | <0.001                    |
| 70                                               | 0.19                                  | 0.10                | 0.37                  | <0.001                     | 0.08                           | 0.46                           | <0.001                    |
| 80                                               | 0.13                                  | 0.04                | 0.45                  | 0.001                      | 0.02                           | 0.69                           | 0.008                     |
| Global test: CS vs CF                            |                                       | DF=8                | Wald statistic=408.0  |                            | p<0.001                        |                                |                           |
| <i>Threshold (rad/sec<sup>2</sup>)</i>           | <i>Ratio of mean impacts per game</i> | <i>Lower 95% CL</i> | <i>Upper 95% CL</i>   | <i>Uncorrected p value</i> | <i>Bonferroni Lower 95% CL</i> | <i>Bonferroni Upper 95% CL</i> | <i>Bonferroni p value</i> |
| 0                                                | 1.28                                  | 0.59                | 2.80                  | 0.531                      | 0.45                           | 3.67                           | 1.000                     |
| 2000                                             | 0.86                                  | 0.39                | 1.87                  | 0.698                      | 0.30                           | 2.45                           | 1.000                     |
| 4000                                             | 0.47                                  | 0.26                | 0.85                  | 0.013                      | 0.22                           | 1.05                           | 0.077                     |
| 6000                                             | 0.35                                  | 0.18                | 0.68                  | 0.002                      | 0.15                           | 0.85                           | 0.010                     |
| 8000                                             | 0.24                                  | 0.13                | 0.46                  | <0.001                     | 0.10                           | 0.57                           | <0.001                    |
| 10000                                            | 0.20                                  | 0.09                | 0.43                  | <0.001                     | 0.07                           | 0.57                           | <0.001                    |
| 12000                                            | 0.14                                  | 0.05                | 0.38                  | <0.001                     | 0.04                           | 0.54                           | 0.001                     |
| 14000                                            | 0.08                                  | 0.03                | 0.21                  | <0.001                     | 0.02                           | 0.29                           | <0.001                    |
| Global test: CS vs. CF                           |                                       | DF=8                | Wald statistic=233.1  |                            | p<0.001                        |                                |                           |
| <i>Threshold (g)</i>                             | <i>Ratio of mean impacts per game</i> | <i>Lower 95% CL</i> | <i>Upper 95% CL</i>   | <i>Uncorrected p value</i> | <i>Bonferroni Lower 95% CL</i> | <i>Bonferroni Upper 95% CL</i> | <i>Bonferroni p value</i> |
| <i>College Lacrosse vs. High School Football</i> |                                       |                     |                       |                            |                                |                                |                           |
| 10                                               | 0.80                                  | 0.46                | 1.39                  | 0.433                      | 0.38                           | 1.68                           | 1.000                     |
| 20                                               | 0.52                                  | 0.30                | 0.88                  | 0.015                      | 0.25                           | 1.06                           | 0.090                     |
| 30                                               | 0.36                                  | 0.18                | 0.73                  | 0.004                      | 0.14                           | 0.93                           | 0.026                     |
| 40                                               | 0.25                                  | 0.14                | 0.45                  | <0.001                     | 0.11                           | 0.55                           | <0.001                    |
| 50                                               | 0.19                                  | 0.10                | 0.37                  | <0.001                     | 0.08                           | 0.46                           | <0.001                    |
| 60                                               | 0.18                                  | 0.06                | 0.49                  | 0.001                      | 0.04                           | 0.70                           | 0.006                     |
| 70                                               | 0.21                                  | 0.08                | 0.56                  | 0.002                      | 0.06                           | 0.79                           | 0.011                     |
| 80                                               | 0.21                                  | 0.05                | 0.90                  | 0.035                      | 0.03                           | 1.48                           | 0.212                     |
| Global test: CL vs. HF                           |                                       | DF=8                | Wald statistic=1333.9 |                            | p<0.001                        |                                |                           |
| <i>Threshold (rad/sec<sup>2</sup>)</i>           | <i>Ratio of mean impacts per game</i> | <i>Lower 95% CL</i> | <i>Upper 95% CL</i>   | <i>Uncorrected p value</i> | <i>Bonferroni Lower 95% CL</i> | <i>Bonferroni Upper 95% CL</i> | <i>Bonferroni p value</i> |
| 0                                                | 0.80                                  | 0.46                | 1.39                  | 0.433                      | 0.38                           | 1.68                           | 1.000                     |
| 2000                                             | 0.60                                  | 0.38                | 0.96                  | 0.033                      | 0.32                           | 1.13                           | 0.196                     |
| 4000                                             | 0.42                                  | 0.23                | 0.75                  | 0.003                      | 0.19                           | 0.91                           | 0.019                     |
| 6000                                             | 0.34                                  | 0.18                | 0.64                  | 0.001                      | 0.14                           | 0.80                           | 0.005                     |
| 8000                                             | 0.30                                  | 0.14                | 0.65                  | 0.002                      | 0.10                           | 0.85                           | 0.013                     |
| 10000                                            | 0.31                                  | 0.13                | 0.71                  | 0.006                      | 0.10                           | 0.95                           | 0.034                     |
| 12000                                            | 0.20                                  | 0.10                | 0.42                  | <0.001                     | 0.08                           | 0.53                           | <0.001                    |
| 14000                                            | 0.05                                  | 0.01                | 0.29                  | 0.001                      | 0.01                           | 0.51                           | 0.004                     |
| Global test: CL vs. HF                           |                                       | DF=8                | Wald statistic=232.4  |                            | p<0.001                        |                                |                           |
| <i>Threshold (g)</i>                             | <i>Ratio of mean impacts per game</i> | <i>Lower 95% CL</i> | <i>Upper 95% CL</i>   | <i>Uncorrected p value</i> | <i>Bonferroni Lower 95% CL</i> | <i>Bonferroni Upper 95% CL</i> | <i>Bonferroni p value</i> |
| <i>College soccer vs. high school football</i>   |                                       |                     |                       |                            |                                |                                |                           |
| 10                                               | 2.17                                  | 0.94                | 5.00                  | 0.068                      | 0.71                           | 6.67                           | 0.407                     |
| 20                                               | 0.80                                  | 0.48                | 1.31                  | 0.371                      | 0.41                           | 1.56                           | 1.000                     |
| 30                                               | 0.64                                  | 0.33                | 1.25                  | 0.192                      | 0.26                           | 1.57                           | 1.000                     |
| 40                                               | 0.56                                  | 0.26                | 1.23                  | 0.151                      | 0.19                           | 1.62                           | 0.903                     |

(continued)

SUPPLEMENTARY TABLE S3. (CONTINUED)

| <i>Threshold (g)</i>                       | <i>Ratio of mean impacts per game</i> | <i>Lower 95% CL</i> | <i>Upper 95% CL</i>     | <i>Uncorrected p value</i> | <i>Bonferroni Lower 95% CL</i> | <i>Bonferroni Upper 95% CL</i> | <i>Bonferroni p value</i> |
|--------------------------------------------|---------------------------------------|---------------------|-------------------------|----------------------------|--------------------------------|--------------------------------|---------------------------|
| 50                                         | 0.40                                  | 0.18                | 0.86                    | 0.019                      | 0.14                           | 1.12                           | 0.112                     |
| 60                                         | 0.33                                  | 0.18                | 0.61                    | <0.001                     | 0.15                           | 0.75                           | 0.002                     |
| 70                                         | 0.45                                  | 0.25                | 0.82                    | 0.009                      | 0.20                           | 1.01                           | 0.055                     |
| 80                                         | 0.28                                  | 0.08                | 0.94                    | 0.039                      | 0.05                           | 1.43                           | 0.236                     |
| Global test: CS vs. HF                     |                                       | DF=8                | Wald statistic = 148.3  |                            |                                | p < 0.001                      |                           |
| <i>Threshold (rad/sec<sup>2</sup>)</i>     | <i>Ratio of mean impacts per game</i> | <i>Lower 95% CL</i> | <i>Upper 95% CL</i>     | <i>Uncorrected p value</i> | <i>Bonferroni Lower 95% CL</i> | <i>Bonferroni Upper 95% CL</i> | <i>Bonferroni p value</i> |
| 0                                          | 1.71                                  | 0.72                | 4.04                    | 0.224                      | 0.51                           | 5.68                           | 1.000                     |
| 2000                                       | 1.15                                  | 0.50                | 2.64                    | 0.749                      | 0.36                           | 3.67                           | 1.000                     |
| 4000                                       | 0.62                                  | 0.31                | 1.24                    | 0.175                      | 0.23                           | 1.63                           | 1.000                     |
| 6000                                       | 0.46                                  | 0.21                | 0.97                    | 0.042                      | 0.16                           | 1.31                           | 0.335                     |
| 8000                                       | 0.32                                  | 0.15                | 0.68                    | 0.003                      | 0.12                           | 0.91                           | 0.024                     |
| 10000                                      | 0.31                                  | 0.14                | 0.66                    | 0.003                      | 0.10                           | 0.90                           | 0.021                     |
| 12000                                      | 0.23                                  | 0.10                | 0.52                    | <0.001                     | 0.08                           | 0.71                           | 0.003                     |
| 14000                                      | 0.14                                  | 0.05                | 0.35                    | <0.001                     | 0.04                           | 0.50                           | <0.001                    |
| Global test: CS vs. HF                     |                                       | DF=8                | Wald statistic = 247.5  |                            |                                | p < 0.001                      |                           |
| <i>Threshold (g)</i>                       | <i>Ratio of mean impacts per game</i> | <i>Lower 95% CL</i> | <i>Upper 95% CL</i>     | <i>Uncorrected p value</i> | <i>Bonferroni Lower 95% CL</i> | <i>Bonferroni Upper 95% CL</i> | <i>Bonferroni p value</i> |
| <i>College lacrosse vs. college soccer</i> |                                       |                     |                         |                            |                                |                                |                           |
| 10                                         | 0.37                                  | 0.17                | 0.80                    | 0.012                      | 0.13                           | 1.05                           | 0.073                     |
| 20                                         | 0.65                                  | 0.42                | 1.00                    | 0.048                      | 0.36                           | 1.16                           | 0.291                     |
| 30                                         | 0.56                                  | 0.26                | 1.20                    | 0.133                      | 0.20                           | 1.56                           | 0.799                     |
| 40                                         | 0.44                                  | 0.19                | 0.99                    | 0.048                      | 0.15                           | 1.32                           | 0.288                     |
| 50                                         | 0.49                                  | 0.21                | 1.13                    | 0.093                      | 0.16                           | 1.50                           | 0.560                     |
| 60                                         | 0.53                                  | 0.19                | 1.51                    | 0.234                      | 0.13                           | 2.17                           | 1.000                     |
| 70                                         | 0.47                                  | 0.18                | 1.22                    | 0.123                      | 0.13                           | 1.70                           | 0.735                     |
| 80                                         | 0.76                                  | 0.13                | 4.45                    | 0.758                      | 0.07                           | 8.22                           | 1.000                     |
| Global test: CL vs. CS                     |                                       | DF=8                | Wald statistic = 2437.1 |                            |                                | p < 0.001                      |                           |
| <i>Threshold (rad/sec<sup>2</sup>)</i>     | <i>Ratio of mean impacts per game</i> | <i>Lower 95% CL</i> | <i>Upper 95% CL</i>     | <i>Uncorrected p value</i> | <i>Bonferroni Lower 95% CL</i> | <i>Bonferroni Upper 95% CL</i> | <i>Bonferroni p value</i> |
| 0                                          | 0.25                                  | 0.10                | 0.64                    | 0.004                      | 0.07                           | 0.92                           | 0.030                     |
| 2000                                       | 0.34                                  | 0.13                | 0.88                    | 0.026                      | 0.09                           | 1.28                           | 0.209                     |
| 4000                                       | 0.51                                  | 0.22                | 1.23                    | 0.135                      | 0.15                           | 1.73                           | 1.000                     |
| 6000                                       | 0.57                                  | 0.23                | 1.44                    | 0.237                      | 0.16                           | 2.07                           | 1.000                     |
| 8000                                       | 0.69                                  | 0.27                | 1.75                    | 0.438                      | 0.19                           | 2.53                           | 1.000                     |
| 10000                                      | 0.78                                  | 0.28                | 2.19                    | 0.638                      | 0.19                           | 3.29                           | 1.000                     |
| 12000                                      | 0.94                                  | 0.33                | 2.64                    | 0.903                      | 0.22                           | 3.97                           | 1.000                     |
| 14000                                      | 1.22                                  | 0.47                | 3.22                    | 0.680                      | 0.32                           | 4.71                           | 1.000                     |
| Global test: CL vs. CS                     |                                       | DF=8                | Wald statistic = 423.7  |                            |                                | p < 0.001                      |                           |

For each pairwise team comparison and each PRLA or PRRA threshold, the following information is provided: ratio of mean impacts per game, uncorrected and Bonferroni corrected 95% confidence limits (95% CL), and uncorrected and Bonferroni corrected *p* values. For each PRLA and PRRA, pairwise global test degrees of freedom (DF), Wald statistic, and *p* values are also provided.

PRLA, peak resultant linear acceleration; PRRA, peak resultant rotational acceleration; HF, high school football; CF, college football; CL, college lacrosse; CS, college soccer.
